# Supplementary material
Source: Springer Nature journal article supplement (https://www.springermedizin.de/resource/supplementary/12958_2005_289_MOESM8_ESM.pdf/9567690)

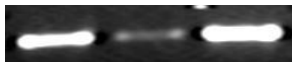

*Defb21*

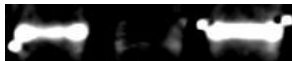

*Defb24*

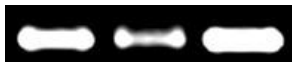

*Defb27*

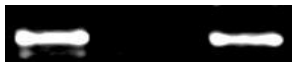

*Defb30*

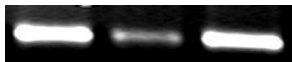

*Defb36*

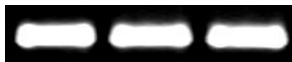

*Gapdh*

**S**

**C**

**C+T**

Supplement: MOESM8 [file 9567690]
